# Supplementary material for: Increased nasal matrix metalloproteinase-1 and -9 expression in smokers with chronic rhinosinusitis and asthma
Source: PubMed Central journal article supplement (PMC6814857; doi:10.1038/s41598-019-51813-6), 2019-10-25
Supplement: 41598_2019_51813_MOESM1_ESM.pdf [file 41598_2019_51813_MOESM1_ESM.pdf]

**Increased nasal matrix metalloproteinase-1 and -9 expression in smokers with chronic rhinosinusitis and asthma**

**Chien-Chia Huang<sup>1,2</sup>; Chun-Hua Wang<sup>3</sup>; Pei-Wen Wu<sup>1,4</sup>; Jung-Ru He<sup>3</sup>; Chi-Che Huang<sup>1,2</sup>; Po-Hung Chang<sup>1,2</sup>; Chia-Hsiang Fu<sup>1,2</sup> and Ta-Jen Lee<sup>1,5</sup>**

-----  
1 Division of Rhinology, Department of Otolaryngology, Chang Gung Memorial Hospital and Chang Gung University, Taoyuan, Taiwan

2 Graduate Institute of Clinical Medical Sciences, College of Medicine, Chang Gung University, Taiwan

3 Department of Thoracic Medicine, Chang Gung Memorial Hospital and Medicine of College, Chang Gung University, Taoyuan, Taiwan

4 Department of Otolaryngology–Head and Neck Surgery, Chang Gung Memorial Hospital and Chang Gung University, Keelung, Taiwan

5 Department of Otolaryngology, Xiamen Chang Gung Hospital, Xiamen, China

.

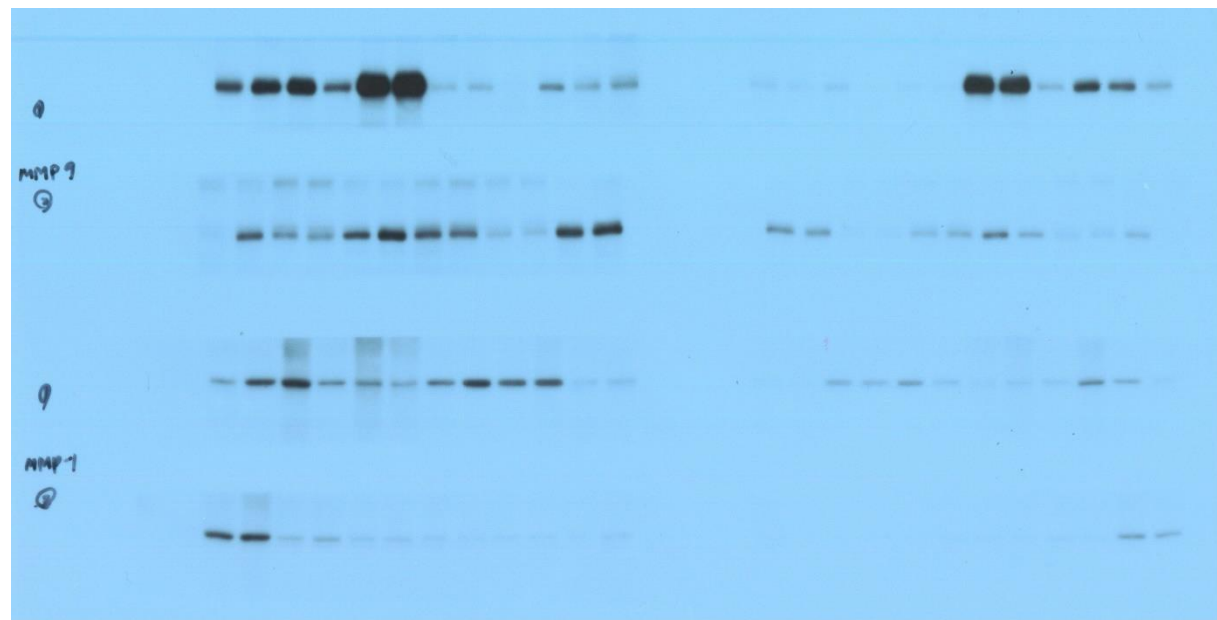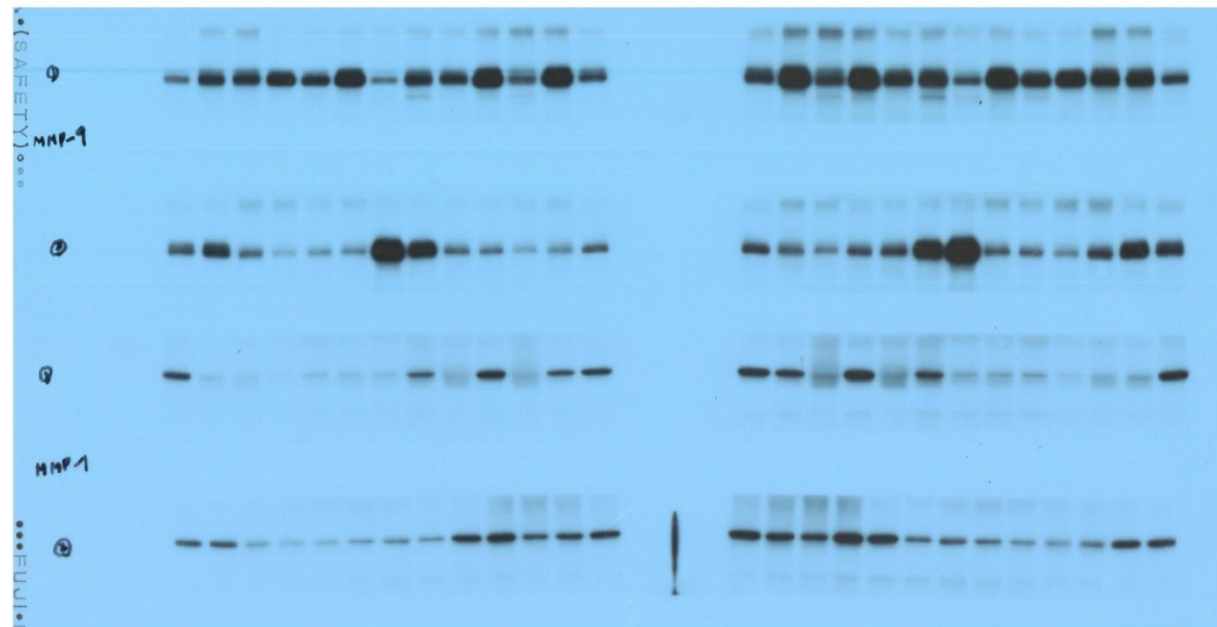

MMP-1 and -9 protein quantification by western blotting

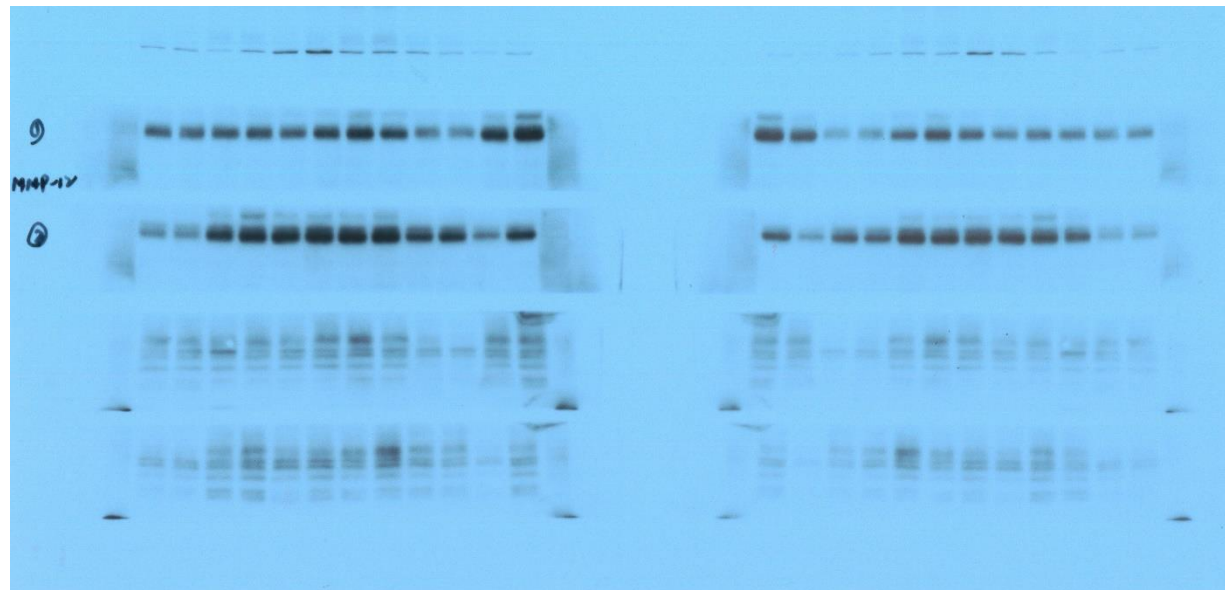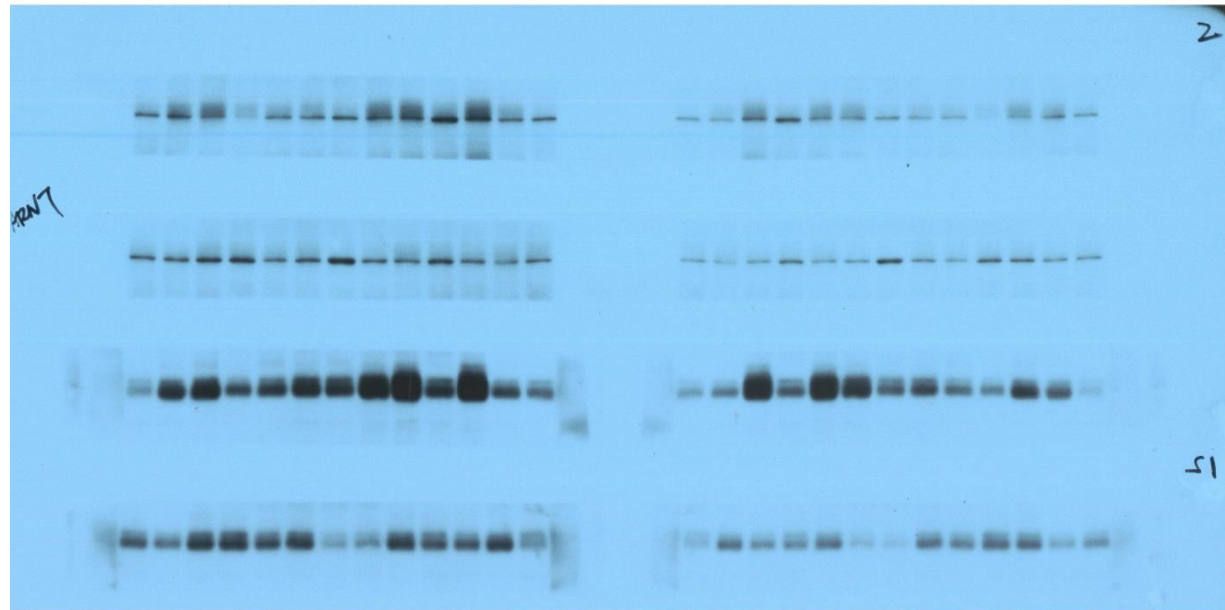

MMP-12 protein quantification by western blotting
